# Supplementary material for: NMDA receptor genotypes associated with the vulnerability to develop dyskinesia
Source: PubMed Central journal article supplement — Transl Psychiatry. 2012 Jan 10;2(1):e67–. doi: 10.1038/tp.2011.66 (PMC3309543; doi:10.1038/tp.2011.66), 2012-01-10
Supplement: tp201166x1.pdf [file tp201166x1.pdf]

Dyskinesia-associated glutamate receptor genotypes - Table 1 Characteristics of patients

| Characteristic                | Psychiatric (N=431)<br>(mean ± S.D.) | Neurological (N=143)<br>(mean ± S.D.) |
|-------------------------------|--------------------------------------|---------------------------------------|
| Schizophrenia (%)             | 401 (95.1)                           | -                                     |
| Parkinson's disease (%)       | -                                    | 101 (70.6)                            |
| Dystonia (%)                  | -                                    | 21 (14.7)                             |
| Tremor (%)                    | -                                    | 21 (14.7)                             |
| Age (years)                   | 41.5 ± 15.3                          | 63.0 ± 11.6                           |
| Gender (male/female)          | 269/162                              | 51/92                                 |
| CPZ equivalents (mg/day)      | 717 ± 770.3                          | -                                     |
| Illness duration (years)      | 16.4 ± 13.5                          | 7.86 ± 6.31                           |
| Use of levodopa in PD (%)     | -                                    | 58/101 (57.3)                         |
| Use of DAR agonists in PD (%) | -                                    | 82/101 (81.2)                         |
| Use of anticholinergics (%)   | 346 (80.3)                           | -                                     |

CPZ, chlorpromazine; PD, Parkinson's disease; DAR, Dopamine receptor.
